# Supplementary material for: Characterization and expression profiling of theICE-CBF-CORgenes in wheat
Source: PeerJ journal article supplement (doi:10.7717/peerj.8190), 2019-11-29
Supplement: Fig_S3.pdf [file Fig_S3.pdf]

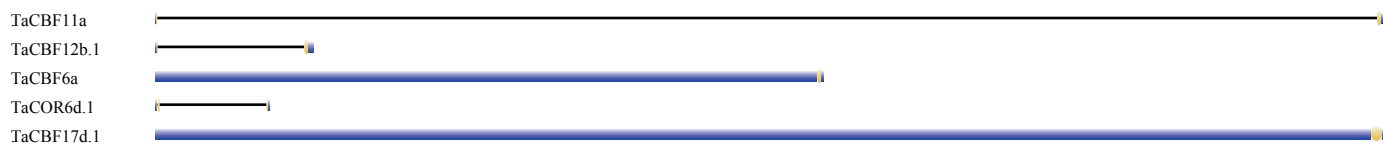

Legend:

● CDS    ■ upstream/ downstream    — Intron
