# Supplementary material for: Characterization and expression profiling of the ICE-CBF-COR genes in wheat
Source: PeerJ. 2019 Nov 29;7:e8190. doi: 10.7717/peerj.8190 (PMC6886486; doi:10.7717/peerj.8190)
Supplement: Table S2 [file peerj-07-8190-s005.xlsx]

## Sheet: Table S2 
Table S2. Distribution and numbers of ICE, CBF and COR genes in different species.
Classification	Species	Abbr.	Database	CBF	COR	ICE	total	Mean
Eudicots	Arabidopsis lyrata	Al	Phytozome	4	4	3	11	15.88
	Arabidopsis thaliana	At	Phytozome	6	5	5	16
	Brassica rapa	Br	Phytozome	9	7	9	25
	Capsella rubella	Cr	Phytozome	5	7	6	18
	Carica papaya	Cp	Phytozome	3	0	3	6
	Citrus clementina	Cc	Phytozome	3	1	6	10
	Citrus sinensis	Cs	Phytozome	7	0	7	14
	Cucumis sativus	Csa	Phytozome	4	1	0	5
	Eucalyptus grandis	Eg	Phytozome	16	3	5	24
	Eutrema salsugineum	Es	Phytozome	5	7	5	17
	Glycine max	Gm	Phytozome	14	3	16	33
	Gossypium raimondii	Gr	Phytozome	9	2	9	20
	Linum usitatissimum	Lu	Phytozome	14	5	4	23
	Malus domestica	Md	Phytozome	3	7	9	19
	Manihot esculenta	Me	Phytozome	6	1	8	15
	Medicago truncatula	Mt	Phytozome	18	5	0	23
	Populus trichocarpa	Pt	Phytozome	6	3	0	9
	Prunus persica	Pp	Phytozome	7	3	0	10
	Ricinus communis	Rc	Phytozome	5	1	5	11
	salix purpurea	Sp	Phytozome	6	2	0	8
	Theobroma cacao	Tc	Phytozome	3	0	5	8
	Vitis vinifera	Vv	Phytozome	5	3	8	16
	Mimulus guttatus	Mg	Phytozome	8	3	6	17
	Solanum lycopersicum	Sl	Phytozome	7	6	5	18
	Solanum tuberosum	St	Phytozome	9	6	6	21
Monocots	Hordeum vulgare	Hv	Ensemble plants	3	4	4	11	21.375
	Musa acuminata	Ma	Ensemble plants	8	0	1	9
	Oryza sativa	Os	Phytozome	10	4	5	19
	Panicum virgatum	Pv	Phytozome	12	3	7	22
	Setaria italica	Si	Phytozome	4	6	7	17
	Sorghum bicolor	Sb	Phytozome	5	7	8	20
	Triticum aestivum	Ta	Ensemble plants	37	11	5	53
	Zea mays	Zm	Phytozome	10	3	7	20
Basal angiosperms	Amborella trichopoda	Atr	Phytozome	3	1	2	6	6
Pteridophyta	Selaginella moellendorffii	Sm	Phytozome	0	5	5	10	10
Bryophyta	Physcomitrella patens	Ppa	Phytozome	0	1	7	8	4.5
	sphagnum fallax	Sfa	Phytozome	0	1	0	1
Chlorophyta	Chlamydomonas reinhardtii	Cre	Phytozome	0	0	0	0	0
	Coccomyxa subellipsoidea	Csu	Phytozome	0	0	0	0
	Micromonas pusilla	Mp	Phytozome	0	0	0	0
	Ostreococcus lucimarinus	Ol	Phytozome	0	0	0	0
	Volvox carteri	Vc	Phytozome	0	0	0	0
				274	131	188	593
