# Supplementary material for: Characterization and expression profiling of the ICE-CBF-COR genes in wheat
Source: PeerJ. 2019 Nov 29;7:e8190. doi: 10.7717/peerj.8190 (PMC6886486; doi:10.7717/peerj.8190)
Supplement: Table S5 [file peerj-07-8190-s008.xlsx]

## Sheet: Table S5
Table S5. Function and annotation of cis-acting elements related to wheat ICE, CBF and COR genes.
	Cis_element	PLACE_ID	MotifSeq	MainAnnotation
ABA	DPBFCOREDCDC3	S000292	ACACNNG	A novel class of bZIP transcription factors, DPBF-1 and 2 (Dc3 promoter-binding factor-1 and 2) binding core sequence; Found in the carrot (D.c.) Dc3 gene promoter; Dc3 expression is normally embryo-specific, and also can be induced by ABA; The Arabidopsis abscisic acid response gene ABI5 encodes a bZIP transcription factor; abi5 mutant have a pleiotropic defects in ABA response; ABI5 regulates a…
	MYBATRD22	S000175	CTAACCA	Binding site for MYB (ATMYB2) in dehydration-responsive gene, rd22; MYB binding site in rd22 gene of Arabidopsis thaliana; ABA-induction; Located at ca. -141 of rd22 gene; Also MYC at ca. -200 of rd22 gene; See S000174 (MYCATRD22); See S000355;
	RYREPEATBNNAPA	S000264	CATGCA	"RY repeat" found in RY/G box (the complex containing the two RY repeats and the G-box) of napA gene in Brassica napus (B.n.); Found between -78 and -50; Required for seed specific expression; See S000262, S000263; dist B ABRE mediated transactivation by ABI3 adn ABI3-dependent response to ABA; a tetramer of the composite RY/G complex mediated only ABA-independent transactivation by ABI3; B2 doma…
	MYCATRD22	S000174	CACATG	Binding site for MYC (rd22BP1) in Arabidopsis (A.t.) dehydration-resposive gene, rd22; MYC binding site in rd22 gene of Arabidopsis thaliana; ABA-induction; Located at ca. -200 of rd22 gene; Also MYB at ca. -141 of rd22 gene; See also S000175 (MYBATRD22);
	ABRERATCAL	S000507	MACGYGB	"ABRE-related sequence" or "Repeated sequence motifs" identified in the upstream regions of 162 Ca(2+)-responsive upregulated genes; see also ABRE; M=C/A; Y=T/C; B=T/C/G;
	ABRELATERD1	S000414	ACGTG	ABRE-like sequence (from -199 to -195) required for etiolation-induced expression of erd1 (early responsive to dehydration) in Arabidopsis;
Cold	LTRE1HVBLT49	S000250	CCGAAA	"LTRE-1" (low-temperature-responsive element) in barley (H.v.) blt4.9 gene promoter; A new LTRE; A previously known LTRE is CCGAC;
	LTRECOREATCOR15	S000153	CCGAC	Core of low temperature responsive element (LTRE) of cor15a gene in Arabidopsis (A.t.); A portion of repeat-C (C-repeat), TGGCCGAC, which is repeated twice in cor15a promoter (Baker et al., 1994); ABA responsiveness; Involved in cold induction of BN115 gene from winter Brassica napus; LTRE; See S000157, S000152; Light signaling mediated by phytochrome is necessary for cold- or drought- induced ge…
Heat	CCAATBOX1	S000030	CCAAT	Common sequence found in the 5'-non-coding regions of eukaryotic genes; "CCAAT box" found in the promoter of heat shock protein genes; Located immediately upstream from the most distal HSE of the promoter; "CCAAT box" act cooperatively with HSEs to increase the hs promoter activity;
Drougnt	MYCCONSENSUSAT	S000407	CANNTG	MYC recognition site found in the promoters of the dehydration-responsive gene rd22 and many other genes in Arabidopsis; Binding site of ATMYC2 (previously known as rd22BP1); see S000144 (E-box; CANNTG), S000174 (MYCATRD22); N=A/T/G/C; MYC recognition sequence in CBF3 promoter; Binding site of ICE1 (inducer of CBF expression 1) that regulates the transcription of CBF/DREB1 genes in the cold in Ar…
	MYB1AT	S000408	WAACCA	MYB recognition site found in the promoters of the dehydration-responsive gene rd22 and many other genes in Arabidopsis; W=A/T;
	MYB2CONSENSUSAT	S000409	YAACKG	MYB recognition site found in the promoters of the dehydration-responsive gene rd22 and many other genes in Arabidopsis; Y=C/T; K=G/T; See S000177 (MYB2), S000175 (MYBATRD22);
	DRECRTCOREAT	S000418	RCCGAC	Core motif of DRE/CRT (dehydration-responsive element/C-repeat) cis-acting element found in many genes in Arabidopsis and in rice; R=G/A; Os DREB1A bound to GCCGAC more preferentially than to ACCGAC whereas At DREB1A bound to both GCCGAC and ACCGAC efficiently; See S000402 (ACCGAC); Maize ZmDREB1A bound to DRE (Qin et al. 2004); HaDREB2 in Helianthus annuus (sunflower)(Diaz-Martin et al. 2005);
	MYCATERD1	S000413	CATGTG	MYC recognition sequence (from -466 to -461) necessary for expression of erd1 (early responsive to dehydration) in dehydrated Arabidopsis; NAC protein bound specifically to the CATGTG motif (Tran et al., 2004)); NAC protein bound specifically to the CATGTG motif (Tran et al., 2004);
Auxin	ARFAT	S000270	TGTCTC	ARF (auxin response factor) binding site found in the promoters of primary/early auxin response genes of Arabidopsis thaliana (A.t.); AuxRE; See S000337; Binding site of Arabidopsis ARF1 (Auxin response factor1); Sequence found in NDE element in Soybean (G.m.) SAUR (Small Auxin-Up RNA) 15A gene promoter; See S000359, S000360; Found in D1 or D4 element in Soybean (G.m.) GH3 promoter; This element …
	NTBBF1ARROLB	S000273	ACTTTA	NtBBF1(Dof protein from tobacco) binding site in Agrobacterium rhizogenes (A.r.) rolB gene; Found in regulatory domain B (-341 to -306); Required for tissue-specific expression and auxin induction;
	CATATGGMSAUR	S000370	CATATG	Sequence found in NDE element in soybean (G.m.) SAUR (Small Auxin-Up RNA) 15A gene promoter; Involved in auxin responsiveness; See S000359, S000360;
GA	PYRIMIDINEBOXOSRAMY1A	S000259	CCTTTT	Pyrimidine box found in rice (O.s.) alpha-amylase (RAmy1A) gene; Gibberellin-respons cis-element of GARE and pyrimidine box are partially involved in sugar repression; Found in the promoter of barley alpha-amylase (Amy2/32b) gene which is induced in the aleurone layers in response to GA; BPBF protein binds specifically to this site; See S000265;
	GAREAT	S000439	TAACAAR	GARE (GA-responsive element); Occurrence of GARE in GA-inducible, GA-responsible, and GA-nonresponsive genes found in Arabidopsis seed germination was 20, 18, and 12%, respectively; see S000181;
Jasmonate	GCCCORE	S000430	GCCGCC	Core of GCC-box found in many pathogen-responsive genes such as PDF1.2, Thi2.1, and PR4; Has been shown to function as ethylene-responsive element; See S000036, S000232, S000332; Appears to play important roles in regulating jasmonate-responsive gene expression; Tomato Pti4 (ERF) regulates defence-related gene expression via GCC box and non-GCC box cis elements (Myb1 (GTTAGTT) and G-box(CACGTG));
	T/GBOXATPIN2	S000458	AACGTG	"T/G-box" found in tomato proteinase inhibitor II (pin2) and leucine aminopeptidase (LAP) genes; Involved in jasmonate (JA) induction of these genes; bHLH-Leu zipper JAMYC2 and JAMYC10 proteins specifically recognaize this motif (Boter et al., 2004);
SA	ASF1MOTIFCAMV	S000024	TGACG	"ASF-1 binding site" in CaMV 35S promoter; ASF-1 binds to two TGACG motifs; See S000023 (AS1); Found in HBP-1 binding site of wheat histone H3 gene; TGACG motifs are found in many promoters and are involved in transcriptional activation of several genes by auxin and/or salicylic acid; May be relevant to light regulation; Binding site of tobacco TGA1a; TGA1a and b show homology to CREB; TGA6 is a …
	WBBOXPCWRKY1	S000310	TTTGACY	"WB box"; WRKY proteins bind specifically to the DNA sequence motif (T)(T)TGAC(C/T), which is known as the W box; Found in amylase gene in sweet potato, alpha-Amy2 genes in wheat, barley, and wild oat, PR1 gene in parsley, and a transcription factor gene in Arabidopsis; The motif was initially registered in PLACEdb as TTGACT, and was corrected to TTGACY on 22 June, 2006; Y=C/T;
	WBOXATNPR1	S000390	TTGAC	"W-box" found in promoter of Arabidopsis thaliana (A.t.) NPR1 gene; Located between +70 and +79 in tandem; They were recognized specifically by salicylic acid (SA)-induced WRKY DNA binding proteins; See S000142 (SQ=TTGACC); See S000310 (SQ=TTTGACY); A cluster of WRKY binding sites act as negative regulatory elements for the inducible expression of AtWRKY18 (Chena and Chen, 2002);
Salt	GT1GMSCAM4	S000453	GAAAAA	"GT-1 motif" found in the promoter of soybean (Glycine max) CaM isoform, SCaM-4; Plays a role in pathogen- and salt-induced SCaM-4 gene expression; See also S000198 (GT-1 consensus);
MEJA	ASF1MOTIFCAMV	S000024	TGACG	"ASF-1 binding site" in CaMV 35S promoter; ASF-1 binds to two TGACG motifs; See S000023 (AS1); Found in HBP-1 binding site of wheat histone H3 gene; TGACG motifs are found in many promoters and are involved in transcriptional activation of several genes by auxin and/or salicylic acid; May be relevant to light regulation; Binding site of tobacco TGA1a; TGA1a and b show homology to CREB; TGA6 is a …
Light regulated	GATABOX	S000039	GATA	"GATA box"; GATA motif in CaMV 35S promoter; Binding with ASF-2; Three GATA box repeats were found in the promoter of Petunia (P.h.) chlorophyll a/b binding protein, Cab22 gene; Required for high level, light regulated, and tissue specific expression; Conserved in the promoter of all LHCII type I Cab genes;
	IBOXCORE	S000199	GATAA	"I box"; "I-box"; Conserved sequence upstream of light-regulated genes; Conserved sequence upstream of light-regulated genes of both monocots and dicots; See IBOX (S000124);
	INRNTPSADB	S000395	YTCANTYY	"Inr (initiator)" elements found in the tobacco psaDb gene promoter without TATA boxes; Light-responsive transcription of psaDb depends on Inr, but not TATA box;
	GT1CONSENSUS	S000198	GRWAAW	Consensus GT-1 binding site in many light-regulated genes, e.g., RBCS from many species, PHYA from oat and rice, spinach RCA and PETA, and bean CHS15; R=A/G; W=A/T; For a compilation of related GT elements and factors, see Villain et al. (1996); GT-1 can stabilize the TFIIA-TBP-DNA (TATA box) complex; The activation mechanism of GT-1 may be achieved through direct interaction between TFIIA and GT…
	IBOXCORENT	S000424	GATAAGR	"I-box core motif" in the CAMs (conserved DNA modular arrays) associated with light-responsive promoter regions; See S000124 (GATAAG), S000199 (GATAA), S000213;
	IBOX	S000124	GATAAG	"I box"; "I-box"; Conserved sequence upstream of light-regulated genes; Sequence found in the promoter region of rbcS of tomato and Arabidopsis; I box (Giuliano et al. 1988); Binding site of LeMYB1, that is a member of a novel class of myb-like proteins; LeMYBI act as a transcriptional activator;
Pollen	GTGANTG10	S000378	GTGA	"GTGA motif" found in the promoter of the tobacco (N.t.) late pollen gene g10 which shows homology to pectate lyase and is the putative homologue of the tomato gene lat56; Located between -96 and -93; See S000280;
	POLLEN1LELAT52	S000245	AGAAA	One of two co-dependent regulatory elements responsible for pollen specific activation of tomato (L.e.) lat52 gene; Found at -72 to -68 region; See S000246 (POLLEN2LELAT52); AGAAA and TCCACCATA (S000246) are required for pollen specific expression; Also found in the promoter of tomato endo-beta-mannanase gene (LeMAN5) gene (Filichkin et al. 2004);
Embryo	CANBNNAPA	S000148	CNAACAC	Core of "(CA)n element" in storage protein genes in Brasica napus (B.n.); embryo- and endosperm-specific transcription of napin (storage protein) gene, napA; seed specificity; activator and repressor;
Endosperm	DOFCOREZM	S000265	AAAG	Core site required for binding of Dof proteins in maize (Z.m.); Dof proteins are DNA binding proteins, with presumably only one zinc finger, and are unique to plants; Four cDNAs encoding Dof proteins, Dof1, Dof2, Dof3 and PBF, have been isolated from maize; PBF is an endosperm specific Dof protein that binds to prolamin box; Maize Dof1 enhances transcription from the promoters of both cytosolic o…
Root	SORLIP1AT	S000482	GCCAC	one of "Sequences Over-Represented in Light-Induced Promoters (SORLIPs) in Arabidopsis; Computationally identified phyA-induced motifs; SORLIP 1 is most over-represented, and most statistically singnificant; See also S000483, S000484, S000485, S000486 (all SORLIPs), and also S000487, S000488, S000489, S000490 (all SORLREPs); Over-represented in light-induced cotyledon and root common genes and ro…
	SORLIP2AT	S000483	GGGCC	one of "Sequences Over-Represented in Light-Induced Promoters (SORLIPs) in Arabidopsis; Computationally identified phyA-induced motifs; See also S000482, S000484, S000485, S000486 (all SORLIPs), and also S000487, S000488, S000489, S000490 (all SORLREPs);
