# Supplementary material for: Characterization and expression profiling of the ICE-CBF-COR genes in wheat
Source: PeerJ. 2019 Nov 29;7:e8190. doi: 10.7717/peerj.8190 (PMC6886486; doi:10.7717/peerj.8190)
Supplement: Table S6 [file peerj-07-8190-s009.xlsx]

## Sheet: Table S6
Table S6. Duplication relationship among 11 pairs of wheat ICE, CBF and COR genes.
Gene ID	Position	Gene ID2	Position
TaCBF1b	1B:562432709-562433929	TaCBF8a	5A:522425183-522426170
TaCBF3a	4A:703931977-703933260	TaCBF18a	7A:27901336-27902013
TaCBF7d	5D:410539177-410539818	TaCBF8a	5A:522425183-522426170
TaCBF8a	5A:522425183-522426170	TaCBF1b	1B:562432709-562433929
TaCBF10a	5A:522082625-522083701	TaCBF9d	5D:410620331-410621158
TaCBF10b	5B:492782354-492783459	TaCBF9d	5D:410620331-410621158
TaCBF17d.1	5D:411148611-411149483	TaCBF17d.2	5D:410952226-410953062
TaCOR1b	4B:623226791-623227457	TaCOR2a	5A:669584536-669585165
TaCOR1d	4D:487654746-487655387	TaCOR2a	5A:669584536-669585165
TaCOR3d	4D:487652834-487653468	TaCOR4a	5A:669582550-669583203
TaCOR6d.1	1D:448424163-448424806	TaCOR6d.2	1D:448388967-448389609
